# Supplementary material for: First-order-reversal-curve analysis of rare earth permanent magnet nanostructures: insight into the coercivity enhancement mechanism through regulating the Nd-rich phase
Source: Royal Society of Chemistry journal article supplement (doi:10.1039/d0qi01108h), 2020-11-13
Supplement: d0qi01108h1.pdf [file d0qi01108h1.pdf]

## Electronic Supplementary Information

### **First-order-reversal-curve analysis of rare earth permanent magnet nanostructures: Insight into coercivity enhancement mechanism through regulating the Nd-rich phase**

Junjie Xu,<sup>a</sup> Kai Zhu,<sup>a</sup> Wei Li,<sup>a</sup> Xiaobai Wang,<sup>a</sup> Ziyu Yang,<sup>a</sup> Yanglong Hou,<sup>a\*</sup> Song Gao<sup>b</sup>

*a Beijing Key Laboratory for Magnetoelectric Materials and Devices (BKL-MMD), Beijing Innovation Center for Engineering Science and Advanced Technology (BIC-ESAT), Department of Materials Science and Engineering College of Engineering, Peking University, Beijing 100871, China.*

*b College of Chemistry and Molecular Engineering, Peking University, Beijing 100871, China.*

\*E-mail: [hou@pku.edu.cn](mailto:houl@pku.edu.cn)

## Supplementary Figures

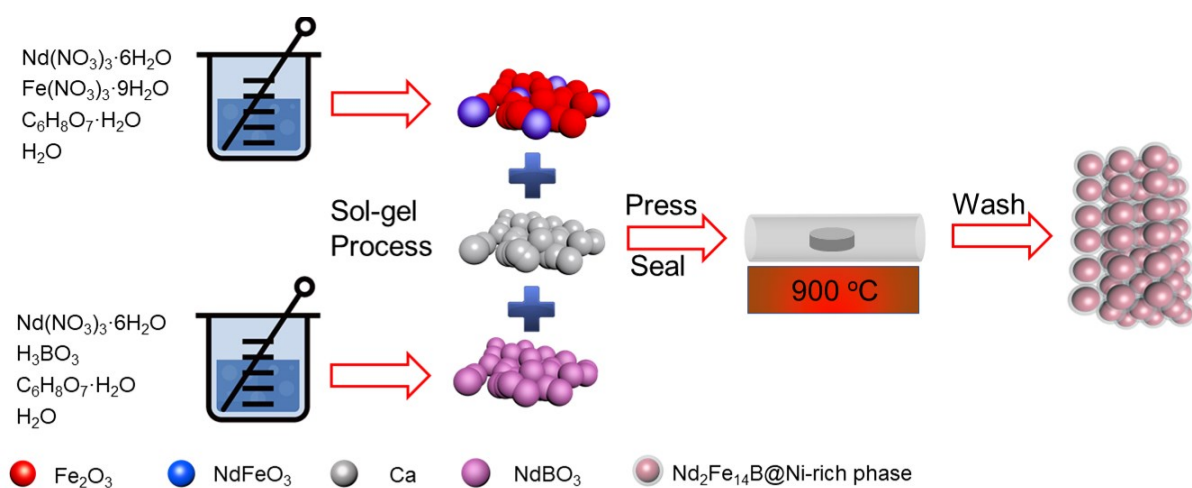

**Figure S1** Schematic illustration of the synthetic process.

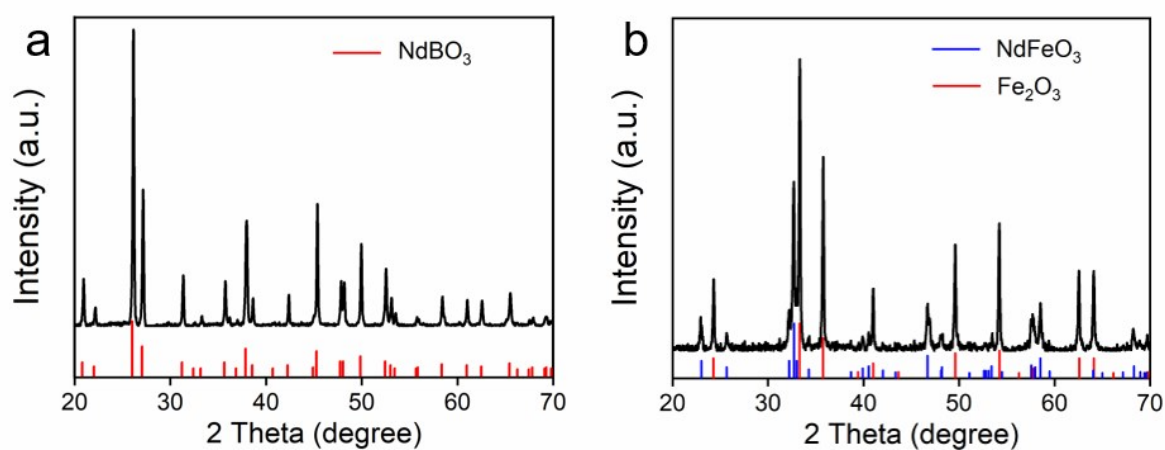

**Figure S2** XRD patterns of (a) Nd-B-O and (b) Nd-Fe-O oxides precursors.

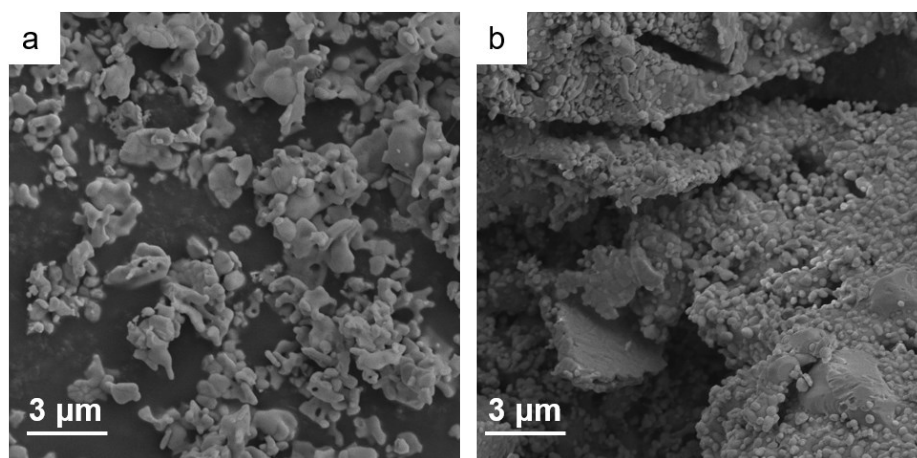

**Figure S3** SEM images of (a) Nd-B-O and (b) Nd-Fe-O oxides.

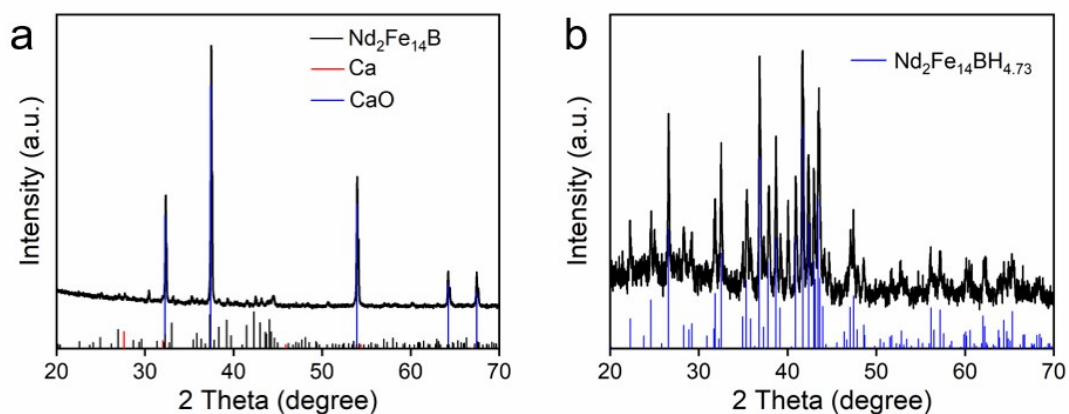

**Figure S4** XRD patterns of (a) the unwashed products of  $\text{Nd}_{15}\text{Fe}_{77}\text{B}_8$  and (b) the products of  $\text{Nd}_{15}\text{Fe}_{77}\text{B}_8$  washed by DI water.

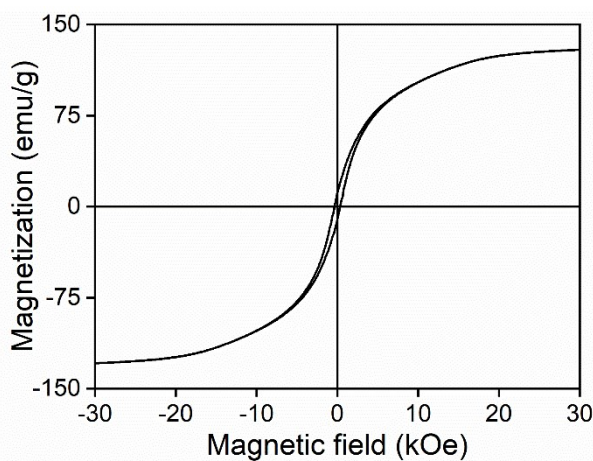

**Figure S5** Room-temperature hysteresis loop of the reduction-diffusion products washed by DI water.

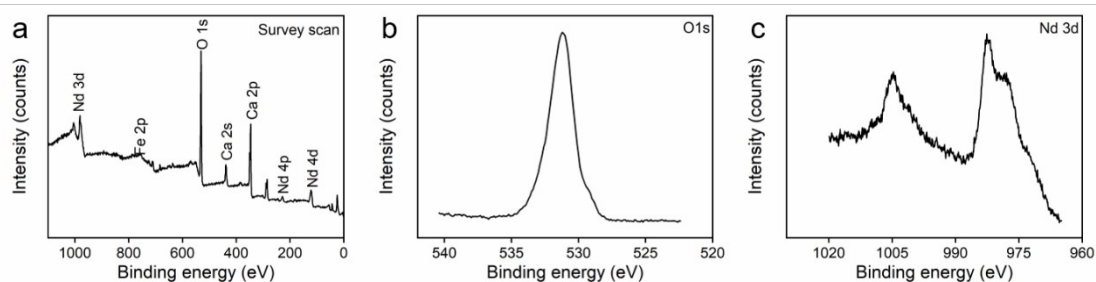

**Figure S6** Survey and fitted XPS of the  $\text{Nd}_2\text{Fe}_{14}\text{B}$ -based nanostructures with a composition of  $\text{Nd}_{15}\text{Fe}_{77}\text{B}_8$ . (a) survey scan, (b) O  $1s$  spectra, and (c) Nd  $3d$  spectra.

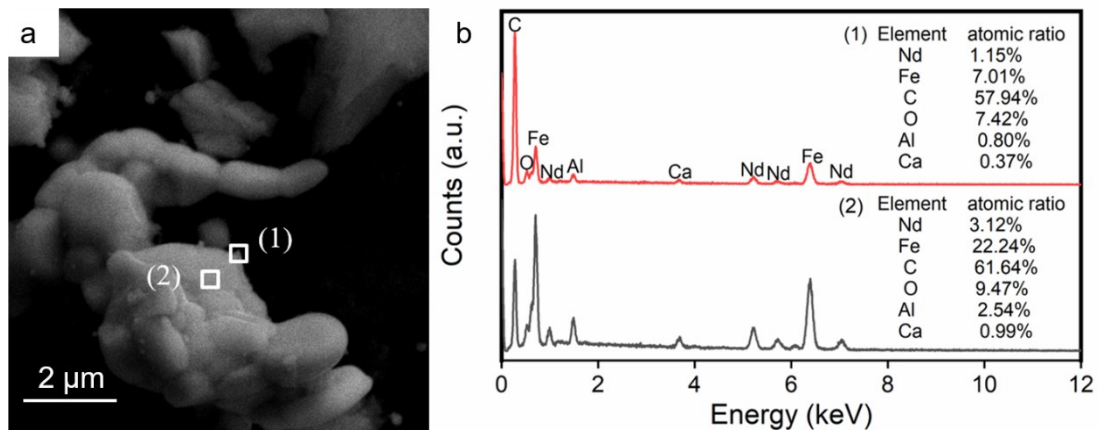

**Figure S7** (a) SEM image and (b) EDX spectra of the  $\text{Nd}_{15}\text{Fe}_{77}\text{B}_8$ .

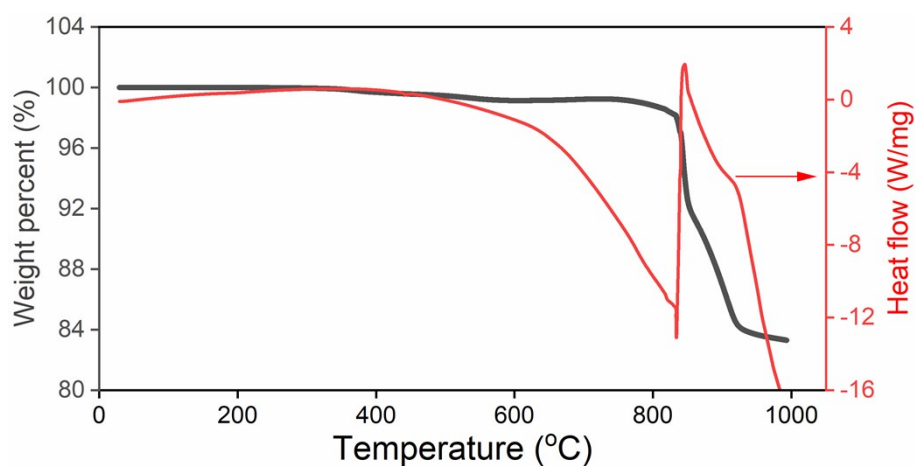

**Figure S8** TG and DSC curves of the reduction-diffusion process.

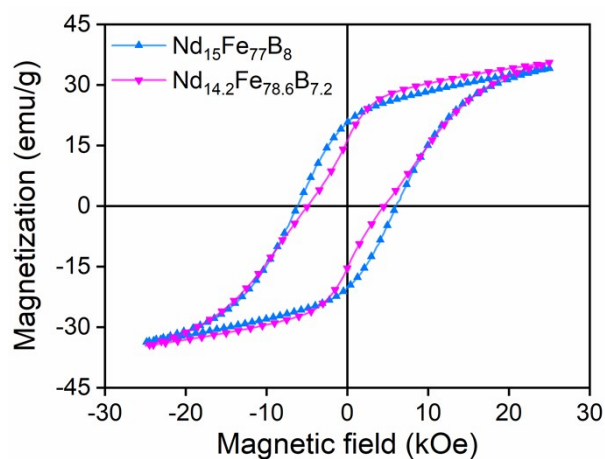

**Figure S9** Room-temperature hysteresis loop of the reduction-diffusion products.

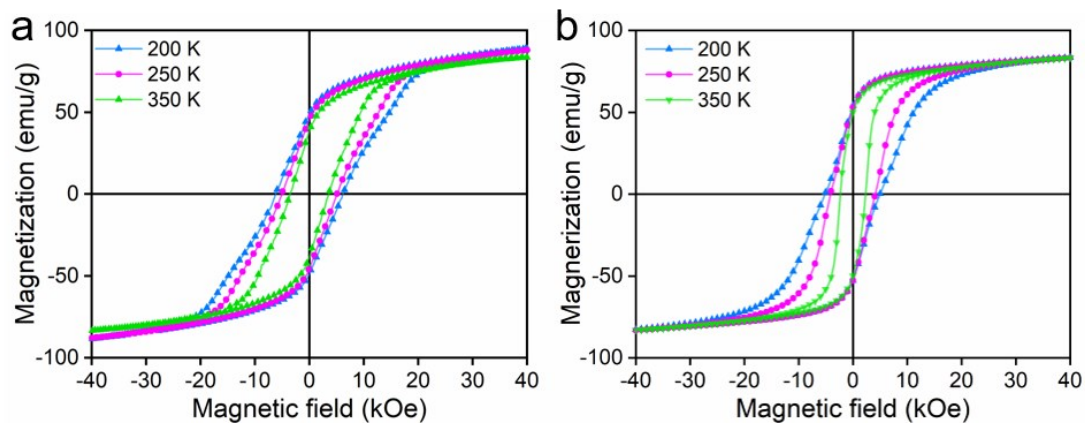

**Figure S10** Hysteresis loops of the  $\text{Nd}_{15}\text{Fe}_{77}\text{B}_8$  and  $\text{Nd}_{14.2}\text{Fe}_{78.6}\text{B}_{7.2}$  at different temperatures.

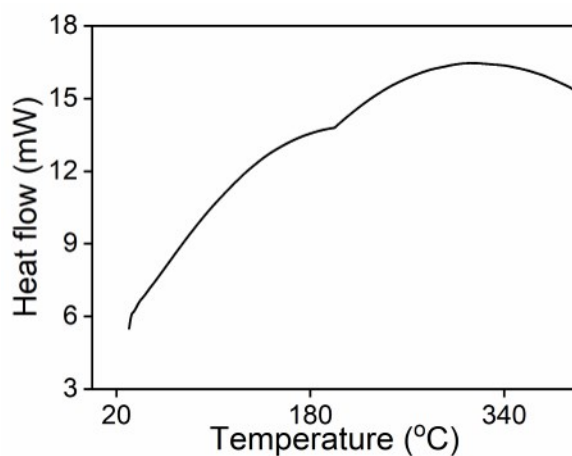

**Figure S11** DSC curve of  $\text{Nd}_{15}\text{Fe}_{77}\text{B}_8$ .

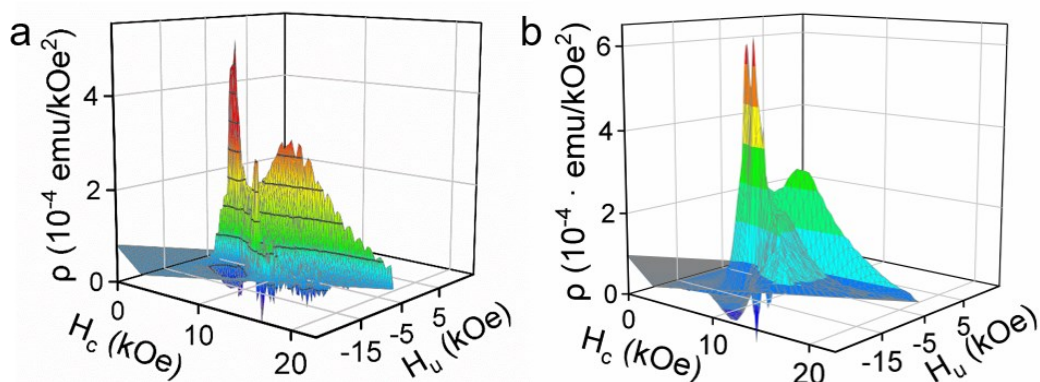

**Figure S12** 3D FORC contours of (a)  $\text{Nd}_{15}\text{Fe}_{77}\text{B}_8$  and (b)  $\text{Nd}_{14.2}\text{Fe}_{78.6}\text{B}_{7.2}$ .
